# Supplementary material for: The impact of calibration strategies on future evapotranspiration projections: a SWAT-T comparison of three hydrological modeling approaches in West Africa
Source: Copernicus journal article supplement (doi:10.5194/egusphere-2025-3836), 2025-09-16
Supplement: Supplementary file 1 [file egusphere-2025-3836-supplement.pdf]

# Supplemental material to: The impact of calibration strategies on future evapotranspiration projections: a SWAT-T comparison of three hydrological modeling approaches in West Africa

Fabian Merk<sup>1</sup>, Timo Schaffhauser<sup>1</sup>, Faizan Anwar<sup>1</sup>, Manuel Rauch<sup>2</sup>, Jan Bliefernicht<sup>2</sup>, and Markus Disse<sup>1</sup>

<sup>1</sup>School of Engineering and Design, Technical University of Munich, Munich, Germany

<sup>2</sup>Institute of Geography, University of Augsburg, Augsburg, Germany

**Correspondence:** Fabian Merk (fabian.merk@tum.de)

## 1 Plant growth modeling with SWAT-T

In SWAT/SWAT-T, the plant growth is computed with the approach of the Environmental Policy Impact Climate (EPIC) model (Arnold et al., 1998), where LAI is a primary vegetation attribute (Neitsch et al., 2011). The plant growth is divided into a growing phase, a period of maturity (growing is halted to a constant LAI), a leaf senescence phase (natural decrease of LAI), and a dormancy phase (plant phenology is stopped to a constant LAI) in SWAT/SWAT-T. The growing phase is initialized by the start of the growing cycle. In SWAT, plant growth is triggered by the accumulation of heat units per day, i.e., based on the daily average temperature the plant experiences. Plant growth in the tropics is however governed by the water availability in the soils rather than the daily temperature (Jolly and Running, 2004). Alemayehu et al. (2017) thus modified the plant growth trigger of the SWAT2012 version and implemented an automatic start of the growing phase. In SWAT-T, plant growth is triggered by the soil moisture index  $S_{smi} = P_a/E_0$ , where  $P_a$  and  $E_0$  are the aggregated precipitation for a user-defined time window (here 5d). An  $S_{smi}$  threshold to start the growing has to be defined (here 0.5). If the computed index is greater than the defined one, the plant starts to grow. To avoid false starts of the new growing cycle, the end of the dry season (SOS1, here October) and the beginning of the rainy season (SOS2, here January) also have to be specified (Alemayehu et al., 2017). The growing phase is controlled by the optimal leaf area development curve:

$$fr_{LAI_{mx}} = \frac{fr_{PHU}}{fr_{PHU} + \exp(l_1 - l_2 \cdot fr_{PHU})}, \quad (1)$$

where  $fr_{LAI_{mx}}$  is the fraction of the maximum LAI of a plant to the fraction of the potential heat units (PHUs) for the plant;  $fr_{PHU}$  is the fraction of the PHUs in the current day of the growth cycle; and  $l_1$  and  $l_2$  are shape coefficients. For optimal conditions, the plant grows until a user-defined maximum LAI ( $LAI_{mx}$ ) is reached:

$$\Delta LAI_i = (fr_{LAI_{mx},i} - fr_{LAI_{mx},i-1}) \cdot LAI_{mx} \cdot (1 - \exp(5 \cdot (LAI_{i-1} - LAI_{mx}))), \quad (2)$$

where  $fr_{LAI_{mx}}$  is the fraction of LAI with respect to  $LAI_{mx}$ .  $LAI_i$  for a given day  $i$  is the sum of the prior  $LAI_{i-1}$  and the growth change  $LAI_i = LAI_{i-1} + \Delta LAI_i$ .

The optimal plant growth in SWAT/SWAT-T can be regulated by water, temperature, nitrogen, or phosphorous stress. The water stress ( $s_w$ ) is directly related to the actual plant transpiration and the total water uptake. The temperature stress ( $s_t$ ) is calculated based on user-defined base and optimal plant growth temperature  $T_{base}$  and  $T_{opt}$ , respectively. Nitrogen and phosphorous stresses ( $s_n$  and  $s_p$ , respectively) are used to describe insufficient nutrient supply. The actual plant growth is constrained by the plant growth factor  $\gamma_{reg}$ :

$$\gamma_{reg} = 1 - \text{Max}(s_w, s_t, s_n, s_p). \quad (3)$$

The actual LAI  $\Delta LAI_{act,i}$  added on a day  $i$  is calculated as:

$$\Delta LAI_{act,i} = \Delta LAI_i \cdot \gamma_{reg}. \quad (4)$$

The growing phase transitions to maturity if enough heat units have accumulated ( $fr_{PHU} = 1$ ), where  $LAI$  remains constant. In the maturity phase, plant transpiration and water uptake continue. The leaf senescence starts as soon as a user-defined fraction of PHU ( $DLAI$ ) is reached. In the original SWAT version, the  $LAI$  decline depends on the fraction  $fr_{phu}$  of day  $i$  and can rapidly drop to zero. The leaf senescence is described as:

$$LAI_{act,i} = LAI \cdot r, \text{ with } r = \frac{1 - fr_{phu,i}}{1 - DLAI}, \text{ if } fr_{phu,i} \geq DLAI. \quad (5)$$

Strauch and Volk (2013) addressed the rapid drop of leaf area and modified the implemented plant module in SWAT accordingly. The LAI decline is thereby computed using a logarithmic approach:

$$LAI_{act,i} = \frac{LAI_{max} - LAI_{min}}{1 + \exp(-12 \cdot r + 6)}, \text{ if } fr_{phu,i} \geq DLAI, \quad (6)$$

where  $LAI_{max}$  and  $LAI_{min}$  refer to the maximum and minimum LAI parameters  $BLAI$  and  $ALAI\_MIN$ , respectively. The logarithmic LAI decline of Strauch and Volk (2013) is also implemented in SWAT-T (Alemayehu et al., 2017). After the leaf senescence phase, the plant growth enters dormancy and the new growing cycle starts depending the soil moisture index.

## References

- Alemayehu, T., van Griensven, A., Woldegiorgis, B. T., and Bauwens, W.: An improved SWAT vegetation growth module and its evaluation for four tropical ecosystems, *Hydrology and Earth System Sciences*, 21, 4449–4467, <https://doi.org/10.5194/hess-21-4449-2017>, 2017.
- Arnold, J. G., Srinivasan, R., Muttiah, R. S., and Williams, J. R.: LARGE AREA HYDROLOGIC MODELING AND ASSESSMENT  
45 PART I: MODEL DEVELOPMENT, *Journal of the American Water Resources Association*, 34, 73–89, <https://doi.org/10.1111/j.1752-1688.1998.tb05961.x>, 1998.
- Jolly, W. M. and Running, S. W.: Effects of precipitation and soil water potential on drought deciduous phenology in the Kalahari, *Global Change Biology*, 10, 303–308, <https://doi.org/10.1046/j.1365-2486.2003.00701.x>, 2004.
- Neitsch, S. L., Arnold, J. G., Kiniry, J. R., and Williams, J. R.: Soil & Water Assessment Tool Theoretical Documentation Version 2009,  
50 2011.
- Strauch, M. and Volk, M.: SWAT plant growth modification for improved modeling of perennial vegetation in the tropics, *Ecological Modelling*, 269, 98–112, <https://doi.org/10.1016/j.ecolmodel.2013.08.013>, 2013.
